# Supplementary material for: Antifungal Activity, Structural Stability, and Immunomodulatory Effects on Human Immune Cells of Defensin from the Lentil Lens culinaris
Source: MDPI journal article supplement (doi:10.3390/membranes12090855), 2022-08-31
Supplement: s1 [file s1]

Supplementary information for

# Antifungal Activity, Structural Stability, and Immunomodulatory Effects on Human Immune Cells of Defensin from the Lentil *Lens culinaris*

Ekaterina I. Finkina <sup>1,\*</sup>, Ivan V. Bogdanov <sup>1</sup>, Anastasia A. Ignatova <sup>1</sup>, Marina D. Kanushkina <sup>1</sup>, Ekaterina A. Egorova <sup>2</sup>, Alexander D. Voropaev <sup>2</sup>, Elena A. Stukacheva <sup>1</sup> and Tatiana V. Ovchinnikova <sup>1</sup>

<sup>1</sup> M.M. Shemyakin & Yu.A. Ovchinnikov Institute of Bioorganic Chemistry, the Russian Academy of Sciences, Miklukho-Maklaya str. 16/10, 117997 Moscow, Russia

<sup>2</sup> G.N. Gabrichevsky Research Institute for Epidemiology and Microbiology, Admiral Makarov str. 10, 125212 Moscow, Russia

\* Correspondence: finkina@mail.ru; Tel.: +7-495-335-42-00

**Table S1.** List of overlapping primers.

| Nº   | primer sequences (5'-3')                                              |
|------|-----------------------------------------------------------------------|
| s1   | CCTCGACGCTAACCTGGCCGGATCTATGAAAACCTTGGAACACTTGGCTGATACCT<br>A         |
| s2   | CTTGGCTGATACCTACCGTGGAGTTTGTTCACCTAATGCTAGTTGTGACGATCACTG<br>TAAAAA   |
| ans3 | CATTTCOAATTATGACACGTGCCTGATATTAGATGTGCTTTATTTTACAGTGATCG              |
| ans4 | GGTGCTCGAGAGAATTCGCGGATCCTTAACAGTTTTGGGTACAGAAGCATTTCCAA<br>TTATGACAC |

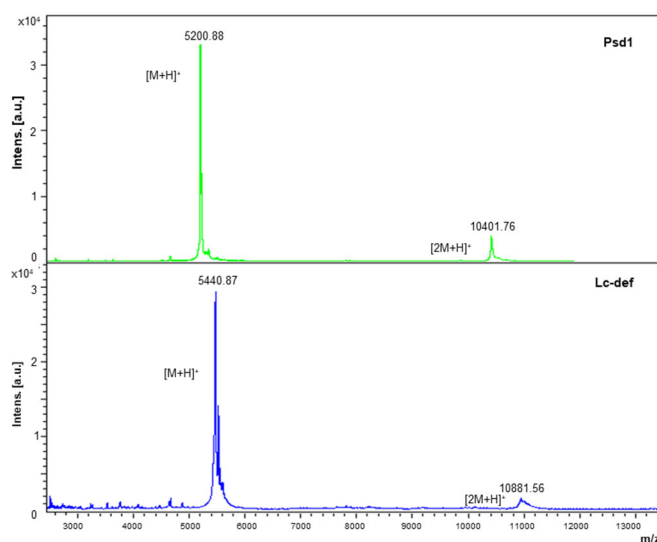

**Figure S1.** MALDI mass spectra of the recombinant defensins.

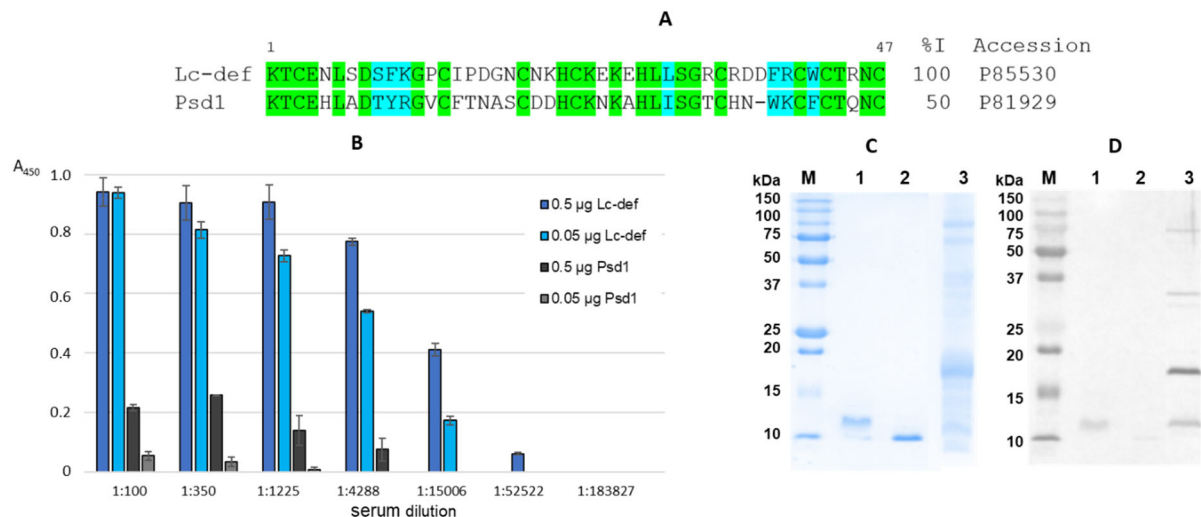

**Figure S2.** (A) Comparison of the amino acid sequences of two legumes defensins – lentil Lc-def and pea Psd1. Identical and similar amino acids are shown in green and blue, respectively. %I, percentage of sequence identity. (B) ELISA with lentil Lc-def and pea Psd1 using rabbit polyclonal anti-Lc-def antibodies. Error bars represent standard deviation between technical replications. (C) SDS-PAGE analysis or (D) immunoblotting with rabbit polyclonal anti-Lc-def antibodies of Lc-def in the absence (1) or present (2) of BME and lysate of *E. coli* cells (3) expressing the fusion protein 8His-Trx1-Lc-def (MW 19kDa).

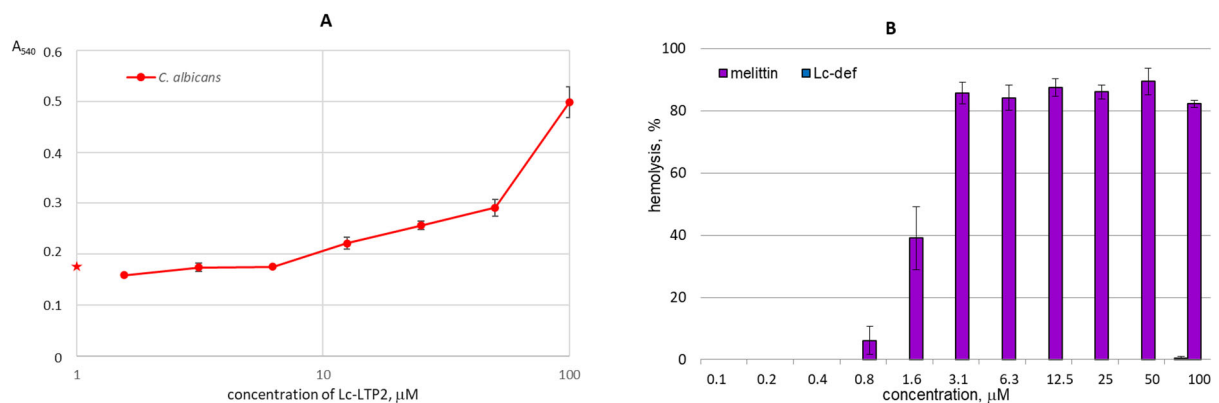

**Figure S3.** (A) The growth of the clinical isolate of *C. albicans* in the presence of different concentrations of lentil lipid transfer protein Lc-LTP2 (100, 50, 25, 12.5, 6.25, 3.125 and 1.56 µM). Asterisk (red) shows optical density of the control without peptide. (B) Hemolytic assay of different concentrations of Lc-def and melittin as positive control. Error bars represent standard deviation between technical replications.

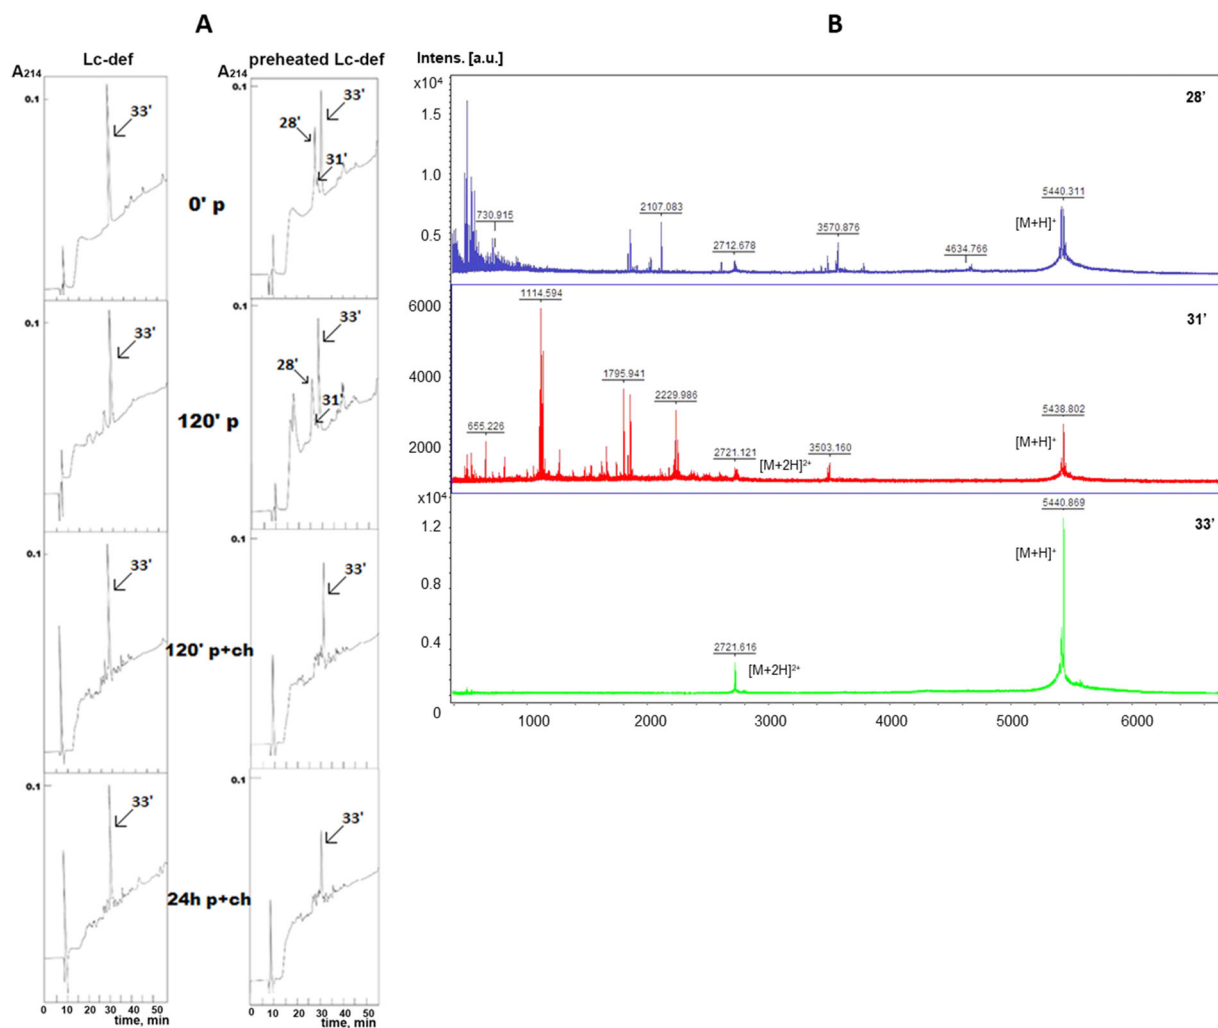

**Figure S4.** (A) Effect of heating on the sensitivity of Lc-def to digestive enzymes as detected by means of RP-HPLC on Luna C<sub>18</sub> column (5  $\mu$ m, 250  $\times$  4.6 mm; Phenomenex) at a flow rate of 0.5 mL/min, using a linear gradient of acetonitrile concentration from 5 to 80% for 60 min in 0.1% trifluoroacetic acid (0' and 120' p— pepsin digestion during 10 s and 120 min; 120' and 24 h p+ch—subsequent digestion by mixture trypsin/ $\alpha$ -chymotrypsin during 120 min and 24 h). (B) MALDI mass spectra of the RP-HPLC fractions (from 28, 31 and 33 min) of Lc-def digests.
